# Supplementary material for: Extraction, purification, and clumped isotope analysis of methane (Δ 13 CDH 3 and Δ 12 CD 2 H 2 ) from sources and the atmosphere
Source: Copernicus journal article supplement (doi:10.5194/egusphere-2023-1906), 2023-10-09
Supplement: Supplementary file 1 [file egusphere-2023-1906-supplement.pdf]

SI

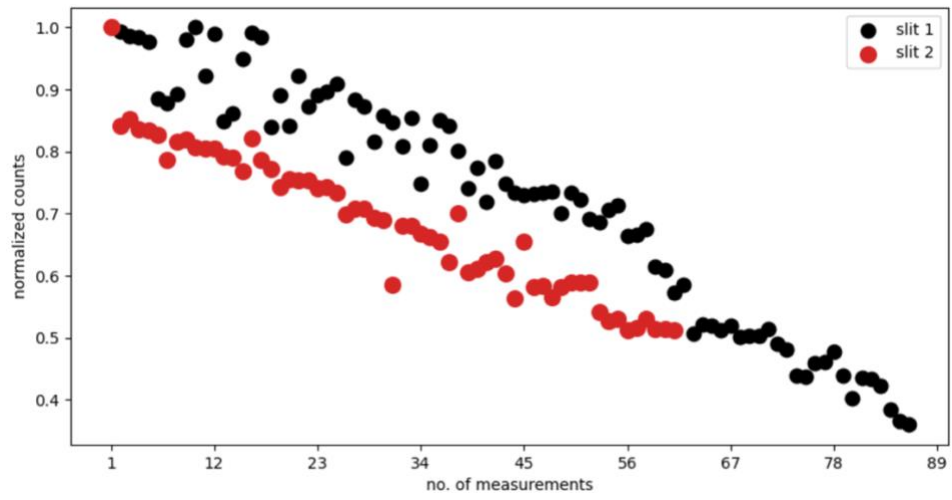

*Fig S1: Normalized counts of detector L3 (mass 16) vs the number of measurements since a new slit was installed, each color representing one slit as mentioned in the legend.*
